# Supplementary material
Source: ML conference proceedings conference paper supplement (https://aclanthology.org/D19-1109)
Supplement: Attachment [file D19-1109.Attachment.zip]

# Appendices

## A Grammatical Transformations

In our experiments, we apply the following transformations to the head **h** and tail **t** of each relational triple before injecting them into the template.

1. If the first word is a noun or adjective, or if the first word is a verb and the second word is a noun or adjective, prepend an indefinite or definite article
2. If the first word is an infinitive verb, convert it to a gerund (i.e. “jump” → “jumping”)
3. If the first word is a number, pluralize the following word (i.e. “two leg” → “two legs”)

We use the default settings in the spaCy Python library (<https://spacy.io/>) for identifying the part of speech. We also use pattern (<https://www.clips.uantwerpen.be/pages/pattern>) for conjugation and pluralization.

## B Hand Crafted Templates

We use the following hand-crafted templates for relations in the ConcpetNet database. Each relation is mapped to a list of several templates. Here, {0} refers to the head entity and {1} refers to the tail.

```
"RelatedTo": [ "{0} is like {1}",
  "{1} is related to {0}", "{0} is related
to {1}" ],
"ExternalURL": [ "{0} is described at
the following URL {1}" ],
"FormOf": [ "{0} is a form of the word
{1}" ],
"IsA": [ "{0} is {1}", "{0} is a type
of {1}", "{0} are {1}", "{0} is a kind of
{1}", "{0} is a {1}" ],
"NotIsA": [ "{0} is not {1}", "{0} is
not a type of {1}", "{0} are not {1}",
"{0} is not a kind of {1}", "{0} is not a
{1}" ],
"PartOf": [ "{1} has {0}", "{0} is part
of {1}", "{0} is a part of {1}" ],
"HasA": [ "{0} has {1}", "{0} contains
{1}", "{0} have {1}" ],
"UsedFor": [ "{0} is used for {1}", "{0}
is for {1}", "You can use {0} to {1}",
"You can use {0} for {1}", "{0} are used
```

```
to {1}", "{0} is used to {1}", "{0} can
be used to {1}", "{0} can be used for
{1}" ],
"CapableOf": [ "{0} can {1}", "An
activity {0} can do is {1}", "{0}
sometimes {1}", "{0} often {1}" ],
"AtLocation": [ "You are likely to find
{0} in {1}", "You are likely to find
{0} at {1}", "Something you find on {1}
is {0}", "Something you find in {1} is
{0}", "Something you find at {1} is {0}",
"Somewhere {0} can be is {1}", "Something
you find under {1} is {0}" ],
"Causes": [ "Sometimes {0} causes
{1}", "Something that might happen as
a consequence of {0} is {1}", "Sometimes
{0} causes you to {1}", "The effect of
{0} is {1}" ],
"HasSubevent": [ "Something you might
do while {0} is {1}", "One of the things
you do when you {0} is {1}", "Something
that might happen while {0} is {1}",
"Something that might happen when you
{0} is {1}", "One of the things you do
when you {1} is {0}", "Something that
might happen when you {1} is {0}" ],
"HasFirstSubevent": [ "the first thing
you do when you {0} is {1}" ],
"HasLastSubevent": [ "the last thing
you do when you {0} is {1}" ],
"HasPrerequisite": [ "something you
need to do before you {0} is {1}", "If
you want to {0} then you should {1}",
"{0} requires {1}" ],
"HasProperty": [ "{0} is {1}", "{0} are
{1}", "{0} can be {1}" ],
"MotivatedByGoal": [ "You would {0}
because you want to {1}", "You would {0}
because you want {1}", "You would {0}
because {1}" ],
"ObstructedBy": [ "{0} can be prevented
by {1}" ],
"Desires": [ "{0} wants {1}", "{0} wants
to {1}", "{0} like to {1}" ],
"CreatedBy": [ "{0} is created by {1}"
],
"Synonyms": [ "{0} and {1} are have
similar meanings", "{0} and {1} are
similar" ],
"Antonym": [ "{0} is the opposite of
{1}" ],
```

```

"DistinctFrom": [ "it cannot be both
{0} and {1}" ],
"DerivedFrom": [ "the word {0} is
derived from the word {1}" ],
"SymbolOf": [ "{0} is a symbol of {1}"
],
"DefinedAs": [ "{0} is defined as {1}",
"{0} is the {1}" ],
"Entails": [ "if {0} is happening, {1}
is also happening" ],
"MannerOf": [ "{0} is a specific way of
doing {1}" ],
"LocatedNear": [ "{0} is located near
{1}" ],
"dbpedia": [ "{0} is conceptually
related to {1}" ],
"SimlarTo": [ "{0} is similar to {1}" ],
"EtymologicallyRelatedTo": [ "the
word {0} and the word {1} have the same
origin" ],
"EtymologicallyDerivedFrom": [ "the
word {0} comes from the word {1}" ],
"CausesDesire": [ "{0} makes people
want {1}", "{0} would make you want to
{1}" ],
"MadeOf": [ "{0} is made of {1}", "{0}
can be made of {1}", "{0} are made of
{1}" ],
"ReceivesAction": [ "{0} can be {1} ",
"{0} is something that you can {1}", "{0}
can receive {1}" ],
"InstanceOf": [ "{0} is an example of
{1}" ],
"NotDesires": [ "{0} does not want {1}",
"{0} doesn't want to {1}", "{0} doesn't
want {1}" ],
"NotUsedFor": [ "{0} is not used for
{1}" ],
"NotCapableOf": [ "{0} is not capable
of {1}", "{0} do not {1}" ],
"NotHasProperty": [ "{0} does not have
the property of {1}" ],
"NotMadeOf": [ "{0} is not made of {1}"
]

```

## C Most Confident Mistakes

| Relation                    | Average Score | Rank |
|-----------------------------|---------------|------|
| (atomic nucleus, IsA, atom) | 1             | 1    |

|                                                  |     |    |
|--------------------------------------------------|-----|----|
| (negative number, HasProperty, positive)         | 1   | 13 |
| (pseudonym, CapableOf, real name)                | 2   | 16 |
| (the harbour, HasA, island)                      | 2   | 19 |
| (the substance, HasA, drug)                      | 2.5 | 20 |
| (plurality voting, HasPrerequisite, majority)    | 1   | 22 |
| (function, ReceivesAction, element of a)         | 0   | 24 |
| (minister, ReceivesAction, member of parliament) | 0.5 | 28 |
| (bombing, IsA, war crime)                        | 2   | 33 |
| (prime minister, ReceivesAction, head of state)  | 0   | 35 |
| (film, Causes, silent version)                   | 1.5 | 36 |
| (island, AtLocation, other side)                 | 1.5 | 37 |
| (subset, ReceivesAction, element of s)           | 0.5 | 40 |
| (monarchy, ReceivesAction, form of government)   | 0.5 | 47 |
| (law, ReceivesAction, cause of action)           | 1   | 48 |
| (weather, UsedFor, heavy rain)                   | 1   | 49 |
| (example, UsedFor, word processing)              | 1.5 | 54 |
| (the violin, HasA, viola)                        | 1   | 56 |
| (electric charge, HasProperty, magnetic)         | 2   | 60 |
| (council, ReceivesAction, form of government)    | 0.5 | 65 |
| (credit card, HasPrerequisite, purchase)         | 1.5 | 66 |
| (episode, Causes, season finale)                 | 1.5 | 69 |
| (lake, AtLocation, eastern part)                 | 1.5 | 73 |
| (overhead cam, UsedFor, engine)                  | 2.5 | 75 |
| (village, AtLocation, northern end)              | 1.5 | 79 |

|                                               |     |    |
|-----------------------------------------------|-----|----|
| (database, IsA, query language)               | 2.5 | 88 |
| (character, CapableOf, voice actor)           | 2.5 | 89 |
| (plural form, UsedFor, word)                  | 2.5 | 94 |
| (electric bass, HasA, double bass)            | 1   | 96 |
| (voter registration, HasPrerequisite, voting) | 1   | 98 |

Table 4: Top 100 most confident commonsense knowledge predictions under the sentence-ranking approach ( $\lambda = 4$ ) receiving an average score below 3 from the human annotators in the “Mining Wikipedia” task.

| Relation                                        | Average Score | Rank |
|-------------------------------------------------|---------------|------|
| (the violin, HasA, viola)                       | 1             | 8    |
| (database, IsA, query language)                 | 2.5           | 15   |
| (majority party, Causes, majority coalition)    | 2.5           | 14   |
| (playoff, Causes, wild card)                    | 1             | 13   |
| (neutron emission, Causes, fission)             | 2.5           | 19   |
| (the target, HasA, velocity)                    | 2             | 22   |
| (electric bass, HasA, double bass)              | 1             | 20   |
| (music video, UsedFor, cameo)                   | 2             | 24   |
| (engine, CapableOf, second stage)               | 2.5           | 27   |
| (site, UsedFor, state park)                     | 2.5           | 32   |
| (brain, Causes, spinal cord)                    | 2             | 35   |
| (demand, IsA, marginal utility)                 | 0.5           | 37   |
| (version, UsedFor, bonus track)                 | 1.5           | 39   |
| (bombing, IsA, war crime)                       | 2             | 40   |
| (theorem, AtLocation, of a)                     | 0             | 45   |
| (airport, HasSubevent, air base)                | 0.5           | 38   |
| (prime minister, ReceivesAction, head of state) | 0             | 42   |

|                                                      |     |    |
|------------------------------------------------------|-----|----|
| (constituency, ReceivesAction, member of parliament) | 0   | 43 |
| (the harbour, HasA, island)                          | 2   | 65 |
| (judge, ReceivesAction, contempt of court)           | 1.5 | 57 |
| (the city, HasProperty, homeless)                    | 2   | 72 |
| (instruction set, UsedFor, execution)                | 1.5 | 70 |
| (resignation, ReceivesAction, removal from office)   | 2   | 68 |
| (the type, HasA, body)                               | 2   | 83 |
| (team, HasSubevent, head coach)                      | 0.5 | 61 |
| (resignation, AtLocation, removal from office)       | 0.5 | 69 |
| (school, UsedFor, junior college)                    | 2   | 78 |
| (regiment, ReceivesAction, medal of honor)           | 0.5 | 80 |
| (wind power, HasSubevent, energy)                    | 2.5 | 91 |
| (mayor, ReceivesAction, form of government)          | 0   | 89 |
| (episode, Causes, season finale)                     | 1.5 | 92 |

Table 5: Top 100 most confident commonsense knowledge predictions under the concatenation approach ( $\lambda = 7$ ) receiving an average score below 3 from the human annotators in the “Mining Wikipedia” task.
